# Supplementary material
Source: PubMed Central journal article supplement (PMC7404209)
Supplement: am0c08592_si_001.pdf [file am0c08592_si_001.pdf]

## Supporting Information

### Eradicating Infecting Bacteria while Maintaining Tissue Integration on Photothermal Nanoparticle-coated Titanium Surfaces

Xiaoxiang Ren<sup>a#</sup>, Ruifang Gao<sup>a,c#</sup>, Henny C. van der Mei<sup>a\*</sup>,

Yijin Ren<sup>b</sup>, Brandon W. Peterson<sup>a</sup>, Henk J. Busscher<sup>a</sup>

<sup>#</sup>both first authors contributed equally to this article

<sup>a</sup> University of Groningen and University Medical Center of Groningen, Department of Biomedical Engineering, Antonius Deusinglaan 1, 9713 AV Groningen, The Netherlands

<sup>b</sup> University of Groningen and University Medical Center of Groningen, Department of Orthodontics, Hanzeplein 1, 9700 RB Groningen, The Netherlands

<sup>c</sup> College of Chemistry, Chemical Engineering and Materials Science, Soochow University, Suzhou, China

**\*Corresponding author:** H.C. van der Mei

Department of Biomedical Engineering, University Medical Center Groningen

Antonius Deusinglaan 1, 9713 AV Groningen, The Netherlands

Phone: +31 50 361 6094

e-mail: [h.c.van.der.mei@umcg.nl](mailto:h.c.van.der.mei@umcg.nl)

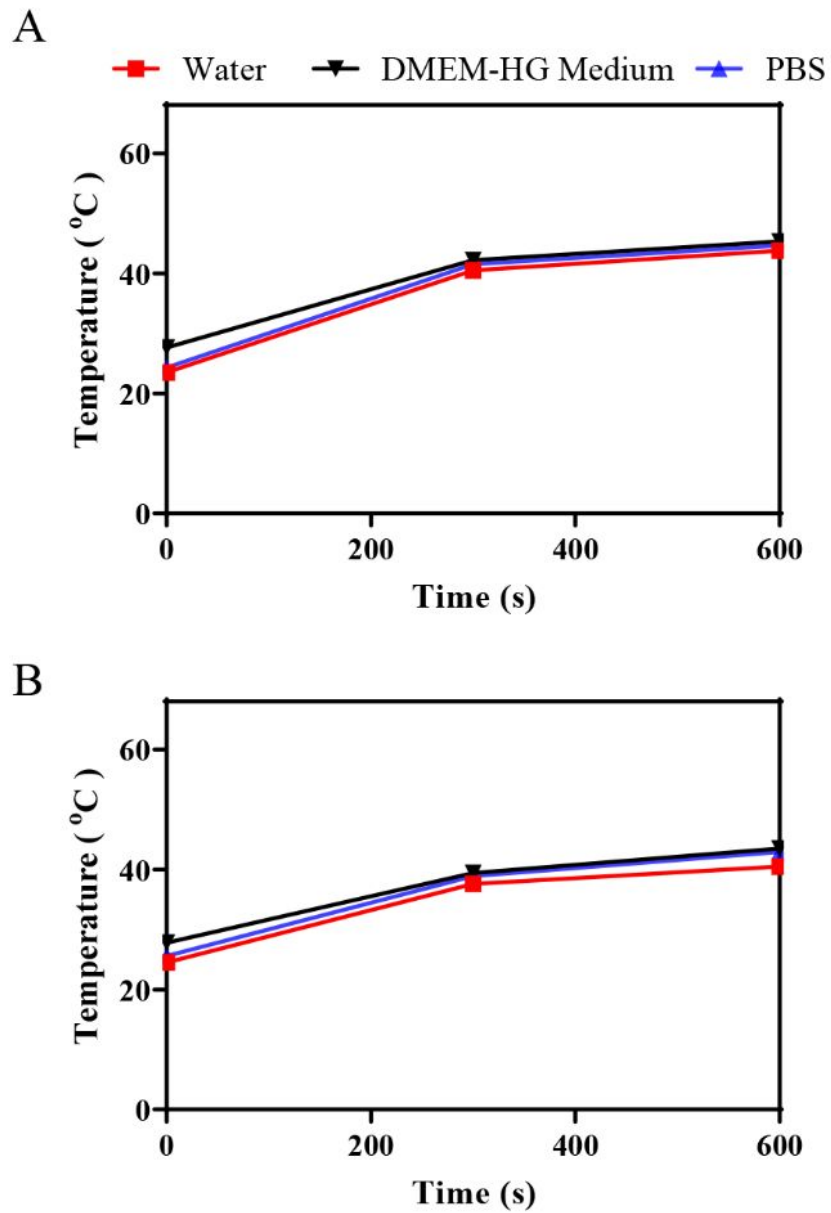

**Figure S1. Photothermal effects of titanium samples immersed in different fluids.**

A. Temperature of PDA-NP coated titanium as a function of NIR irradiation time at 808 nm ( $1 \text{ W/cm}^2$ ) immersed in  $10 \text{ }\mu\text{L}$  of fluid above the sample.

B. Same as (A), but now for immersion in  $300 \text{ }\mu\text{L}$  of fluid above the sample.

**Table S1. Killing (%) of *S. aureus* ATCC12600 adhering on PDA-NP (200  $\mu\text{g}/\text{cm}^2$ ) coated titanium surfaces immersed in different PBS volumes after different NIR irradiation times (1  $\text{W}/\text{cm}^2$ ). Staphylococcal killing was expressed with respect to the number of CFUs observed on samples in absence of NIR irradiation.**

| <b>NIR irradiation time (min)</b> | <b>10 <math>\mu\text{L}</math></b> | <b>50 <math>\mu\text{L}</math></b> | <b>100 <math>\mu\text{L}</math></b> | <b>300 <math>\mu\text{L}</math></b> | <b>600 <math>\mu\text{L}</math></b> |
|-----------------------------------|------------------------------------|------------------------------------|-------------------------------------|-------------------------------------|-------------------------------------|
| 0.5                               | 42.1                               | 37.5                               | 23.4                                | 15.6                                | 15.6                                |
| 1                                 | 93.8                               | 86.3                               | 81.7                                | 78.1                                | 73.4                                |
| 3                                 | 99.9                               | 99.2                               | 96.1                                | 84.4                                | 75.2                                |
| 5                                 | 99.9                               | 99.9                               | 99.9                                | 99.9                                | 76.6                                |
| 10                                | 99.9                               | 99.9                               | 99.9                                | 99.9                                | 94.1                                |
